# Supplementary material for: Uptake and cost of influenza vaccines in a private health insured South African population
Source: PubMed Central journal article supplement — S Afr J Infect Dis. Author manuscript; Available in PMC 2020 Feb 12. (PMC7015168; doi:10.4102/sajid.v33i5.138), 2018-08-20
Supplement: NIHMS1017125-supplement-Supplemental_data.pdf [file NIHMS1017125-supplement-Supplemental_data.pdf]

## Supplemental table

### Chronic Disease List

---

**Addison's disease**

Asthma

Bronchiectasis

Cardiac Failure

Cardiomyopathy

Chronic obstructive pulmonary disorder

Chronic renal disease

Coronary artery disease

Crohn's disease

Diabetes insipidus

Diabetes mellitus types 1 & 2

Dysrhythmias

Epilepsy

Glaucoma

Haemophilia

Hyperlipidaemia

Hypertension

Hypothyroidism

Multiple sclerosis

Parkinson's disease

Rheumatoid arthritis

Schizophrenia

Systemic lupus erythematosus

Ulcerative colitis

Bipolar mood disorder

---
